# Supplementary material for: Clinical Effects of the Self-administered Subcutaneous Complement Inhibitor Zilucoplan in Patients With Moderate to Severe Generalized Myasthenia Gravis: Results of a Phase 2 Randomized, Double-Blind, Placebo-Controlled, Multicenter Clinical Trial
Source: PubMed Central journal article supplement — JAMA Neurol. 2020 Feb 17;77(5):1–11. doi: 10.1001/jamaneurol.2019.5125 (PMC7042797; doi:10.1001/jamaneurol.2019.5125), 2020-02-17
Supplement: jamaneurol-77-582-s002.pdf [file jamaneurol-77-582-s002.pdf]

## Supplementary Online Content

Howard JF Jr, Nowak RJ, Wolfe GI, et al; the Zilucoplan MG Study Group. Clinical effects of the self-administered subcutaneous complement inhibitor zilucoplan in patients with moderate to severe generalized myasthenia gravis: results of a phase 2 randomized, double-blind, placebo-controlled, multicenter clinical trial. Published online February 17, 2020. *JAMA Neurol*. doi:10.1001/jamaneurol.2019.5125

**eTable 1.** Efficacy of Zilucoplan Is Independent of Prior Therapies

**eTable 2.** Treatment-Emergent AEs and Injection-Site Reactions

**eFigure 1.** Change From Baseline Over 12 Weeks for 0.1 mg/kg Zilucoplan and Placebo in (A) QMG (B) MG-ADL, (C) MG-QoL15r, and (D) MGC Scores

**eFigure 2.** Radar Plots Suggest Consistency of Improvement Across All 4 End Points When Treated With (A) 0.3 mg/kg Zilucoplan Daily Subcutaneously vs (B) Placebo.

**eFigure 3.** Mean Complement Activity as Measured by Sheep Red Blood Cell Assay (% Hemolysis)

This supplementary material has been provided by the authors to give readers additional information about their work.

**eTable 1. Efficacy of Zilucoplan Is Independent of Prior Therapies**

| Prior Therapy | Treatment Interaction P Value<br>(zilucoplan 0.3 mg/kg vs placebo) |        |      |           |
|---------------|--------------------------------------------------------------------|--------|------|-----------|
|               | QMG                                                                | MG-ADL | MGC  | MG-QoL15r |
| IST           | 0.59                                                               | 0.43   | 0.62 | 0.62      |
| IVIg          | 0.74                                                               | 0.68   | 0.64 | 0.77      |
| PLEX          | 0.21                                                               | 0.49   | 0.29 | 0.45      |

Abbreviations: IST, immunosuppressive therapy; IVIg, intravenous immunoglobulin; MG-ADL, Myasthenia Gravis Activities of Daily Living; MGC, Myasthenia Gravis Composite; MG-QoL15r, Myasthenia Gravis Quality-of-Life revised scale; PLEX, plasma exchange; QMG, Quantitative Myasthenia Gravis.

**eTable 2. Treatment-Emergent AEs and Injection-Site Reactions**

| <b>Patients, n</b>                                           | <b>Placebo<br/>(n = 15)</b> | <b>Zilucoplan<br/>0.1 mg/kg<br/>(n = 15)</b> | <b>Zilucoplan<br/>0.3 mg/kg<br/>(n = 14)</b> |
|--------------------------------------------------------------|-----------------------------|----------------------------------------------|----------------------------------------------|
| Patients with AEs                                            | 12                          | 15                                           | 12                                           |
| Patients with treatment-related AEs                          | 3                           | 8                                            | 3                                            |
| Patients with serious AEs                                    | 3                           | 0                                            | 5                                            |
| Patients with treatment-related serious AEs                  | 0                           | 0                                            | 0                                            |
| Patients with most common treatment-related AEs <sup>a</sup> |                             |                                              |                                              |
| Nausea                                                       | 0                           | 2                                            | 0                                            |
| Injection-site bruising                                      | 1                           | 2                                            | 0                                            |
| Injection-site scab                                          | 0                           | 3                                            | 0                                            |
| Contusion                                                    | 0                           | 1                                            | 1                                            |
| Headache                                                     | 1                           | 4                                            | 2                                            |
| Patients with injection-site reactions                       | 2                           | 4                                            | 3                                            |

<sup>a</sup>Occurring in >1 patient.

Abbreviation: AE, adverse event.

**eFigure 1. Change From Baseline Over 12 Weeks for 0.1 mg/kg Zilucoplan and Placebo in (A) QMG (B) MG-ADL, (C) MG-QoL15r, and (D) MGC Scores**

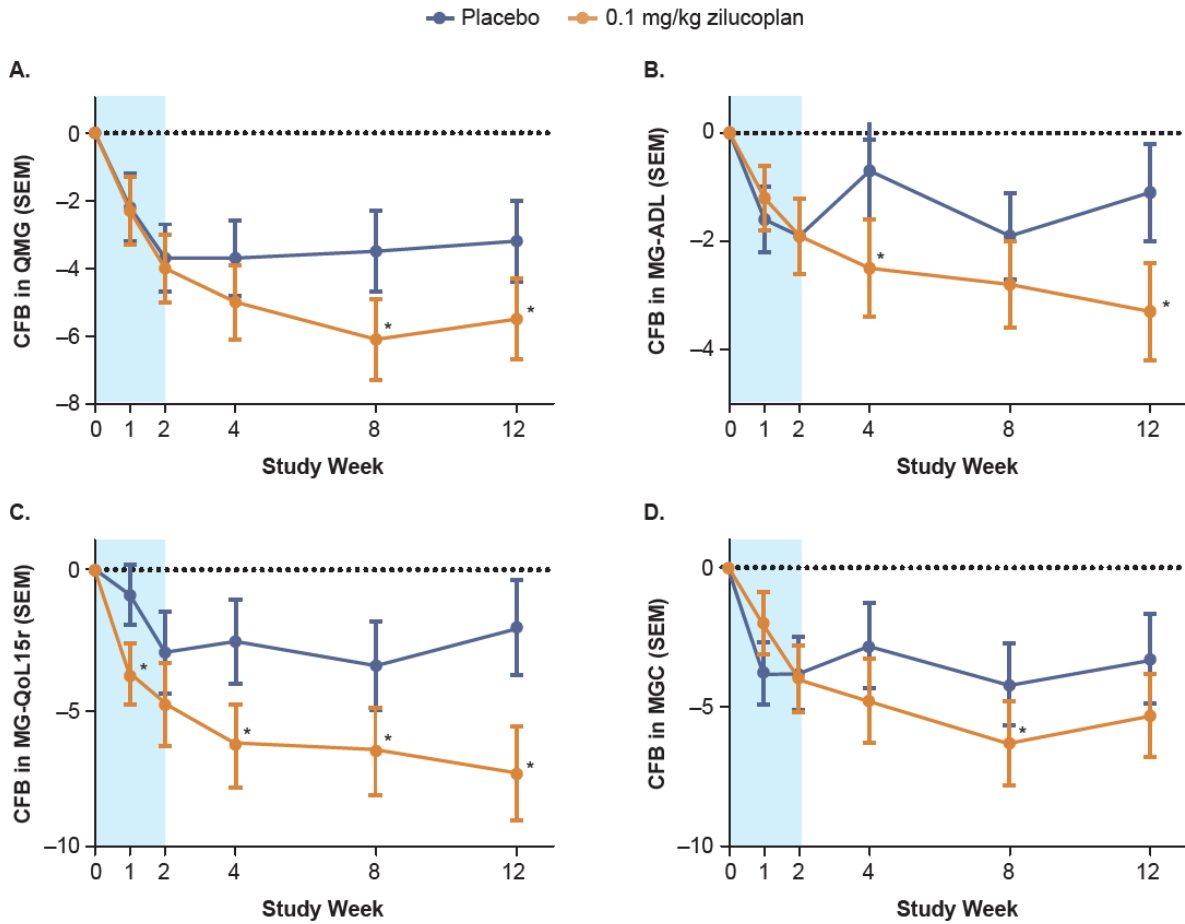

Blue shading highlights the delayed onset of clinical effect of the 0.1-mg/kg dose of zilucoplan as compared to the 0.3-mg/kg dose (Figure 2). \* $P < 0.10$ . CFB, change from baseline; MG-ADL, Myasthenia Gravis Activities of Daily Living; MGC, Myasthenia Gravis Composite; MG-QoL15r, Myasthenia Gravis Quality-of-Life revised scale; QMG, Quantitative Myasthenia Gravis; SEM, standard error of the mean.

**eFigure 2. Radar Plots Suggest Consistency of Improvement Across All 4 End Points When Treated With (A) 0.3 mg/kg Zilucoplan Daily Subcutaneously vs (B) Placebo.**

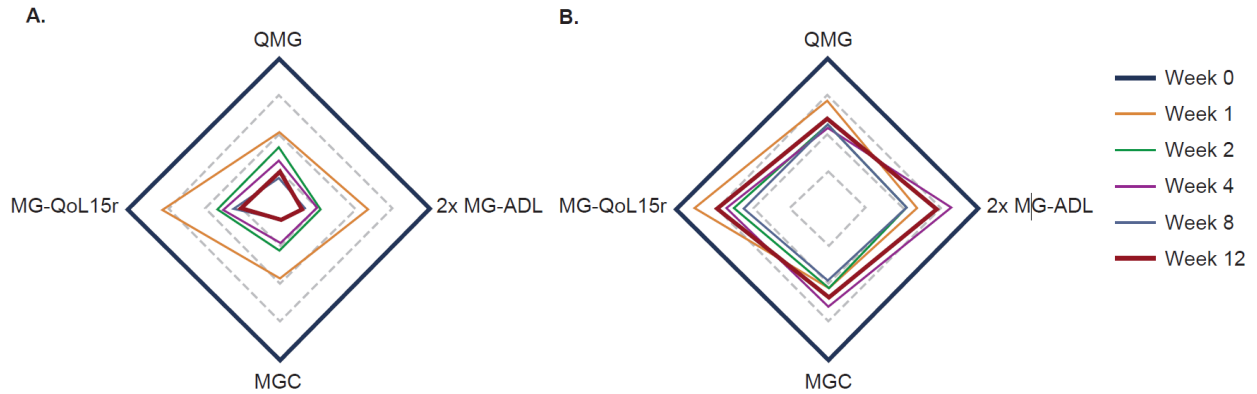

The outermost line on each radar plot represents the baseline (bold dark blue; ie, "0" for all end points), and each concentric dashed square represents a reduction from baseline by 2 points. The center of each plot represents a reduction of 8 points. Mean CFB values for QMG, MGC, and MG-QoL15r are shown. Given the lower dynamic range of the MG-ADL, 2x MG-ADL is represented on the graphs for illustrative purposes. CFB at 12 weeks (bold red) and other time points are as indicated. 2x MG-ADL, 2-fold mean MG-ADL; CFB, change from baseline; MG-ADL, Myasthenia Gravis Activities of Daily Living; MGC, Myasthenia Gravis Composite; MG-QoL15r, Myasthenia Gravis Quality-of-Life revised scale; QMG, Quantitative Myasthenia Gravis.

eFigure 3. Mean Complement Activity as Measured by Sheep Red Blood Cell Assay (% Hemolysis)

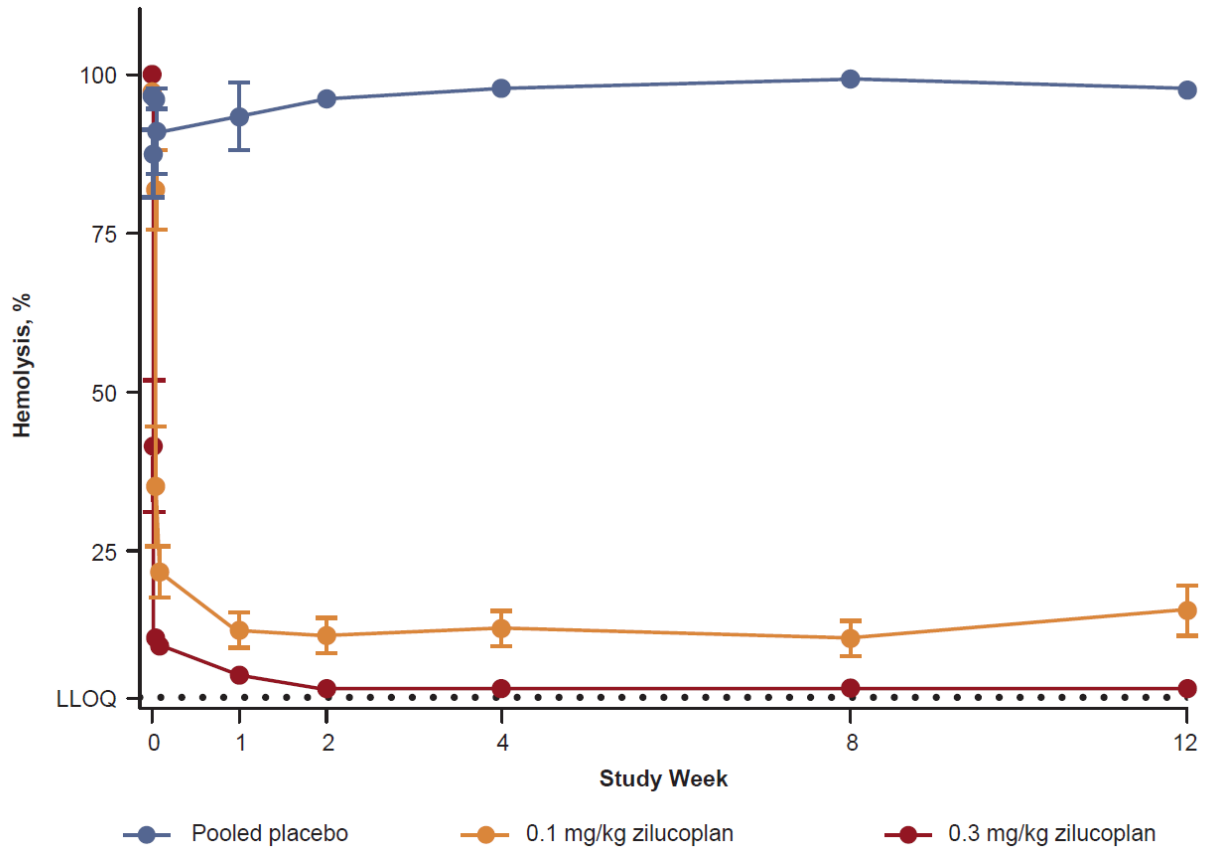

LLOQ, lower limit of quantification.
