# Supplementary material for: Clinical Effects of the Self-administered Subcutaneous Complement Inhibitor Zilucoplan in Patients With Moderate to Severe Generalized Myasthenia Gravis: Results of a Phase 2 Randomized, Double-Blind, Placebo-Controlled, Multicenter Clinical Trial
Source: PubMed Central journal article supplement — JAMA Neurol. 2020 Feb 17;77(5):1–11. doi: 10.1001/jamaneurol.2019.5125 (PMC7042797; doi:10.1001/jamaneurol.2019.5125), 2020-02-17
Supplement: jamaneurol-77-582-s003.pdf [file jamaneurol-77-582-s003.pdf]

## Data Sharing Statement

### Data

**Data available:** No

### Additional Information

**Explanation for why data not available:** Access to participant-level data from this study will not be made available while zilucoplan is in clinical development for generalized myasthenia gravis. Thereafter, qualified academic researchers may request further details regarding trial data availability through the rapharma.com website ([www.rapharma.com](http://www.rapharma.com)).
